# Supplementary material
Source: PubMed Central journal article supplement (PMC3836875)
Supplement: NIHMS511123-supplement-01.pdf [file NIHMS511123-supplement-01.pdf]

## SUPPLEMENTARY MATERIAL

### Supp Figure I

Distribution of Cyp 19 gene expression for batches of granulosa cell samples with replication of qPCR to test for quality control (N=76 IVF cycles, 61 women).

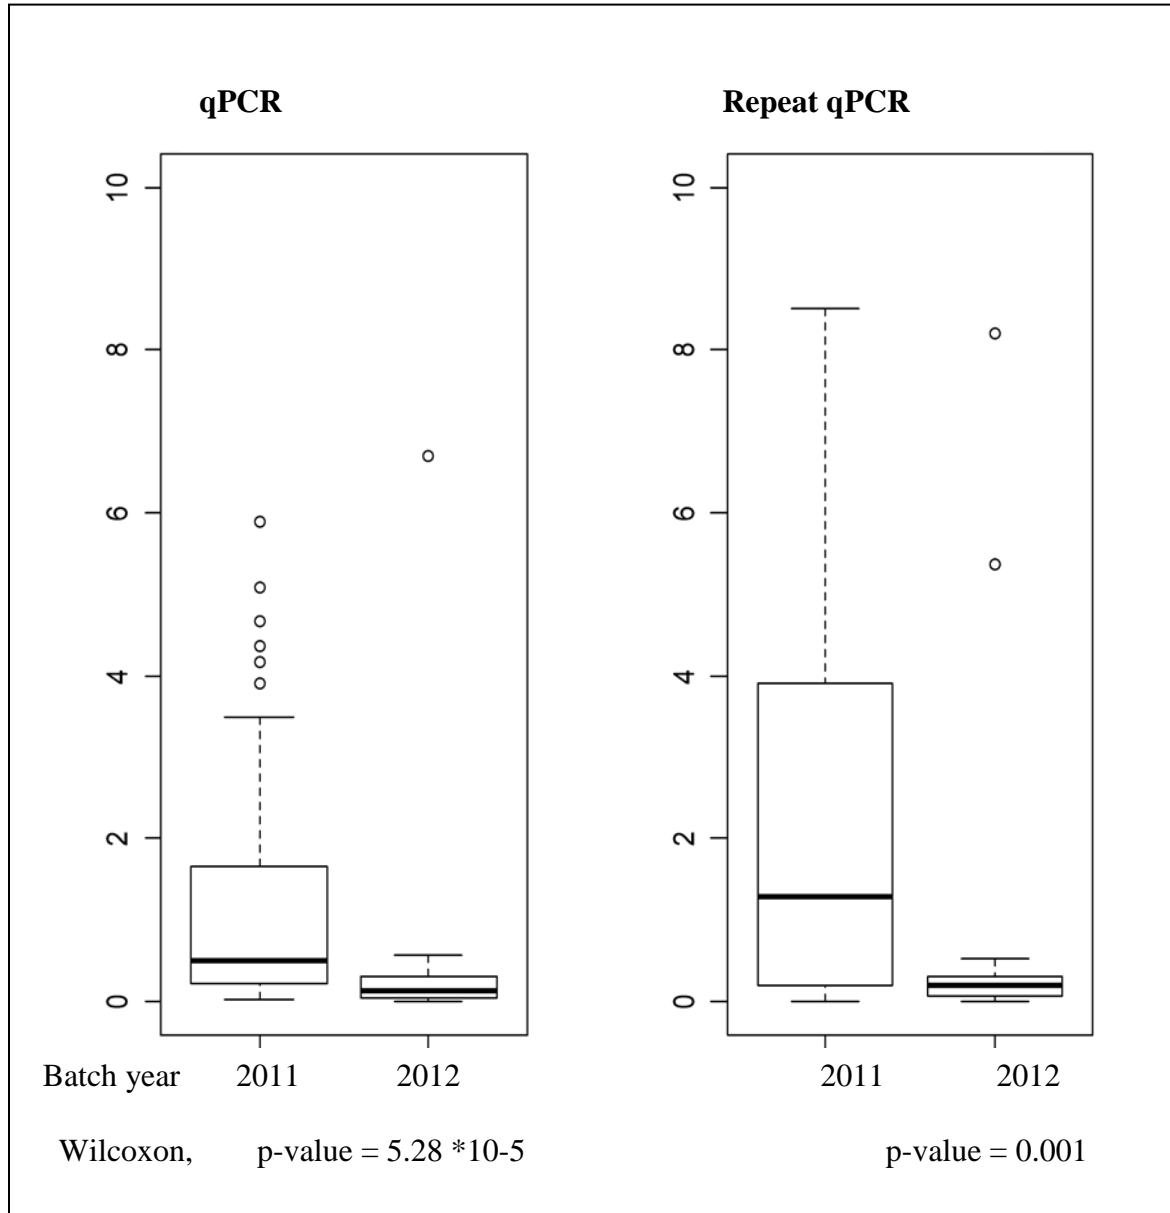

2011 batch: N=55 samples (cycles)

2012 batch: N=21 samples (cycles)

Spearman correlation for *Cyp19* expression for repeated real time PCR = 0.84
